# Supplementary material for: Biomechanical analysis of iliosacral and transiliac–transsacral screw combinations for fixation of undisplaced Denis II vertical shear fractures in dysmorphic sacrum
Source: PeerJ. 2025 Oct 10;13:e20139. doi: 10.7717/peerj.20139 (PMC12517282; doi:10.7717/peerj.20139)
Supplement: Supplemental Information 4 [file peerj-13-20139-s004.xlsx]

## Sheet: Standing
Group	Fixation		Vertical displacement of the superior surface of S1 (mm)		Deformation of the S1 segment screw (mm)	Deformation of the S2 segment screw (mm)	The superior surface of S1 in the sagittal plane angle displacement (degree)	S1 segment screw Maximum Von Mises stress(MPa)	S2 segment screw Maximum Von Mises stress(MPa)				Relative displacement(mm)
		Min	Max	Mean							1	2	3	4	5
Normal
G1	S1-ISS	0.451	0.7004	0.5774	0.63	-	2.8784	104.03	-		0.124772	0.0850804	0.0652527	0.0987397	0.134334
G2	S2-ISS	0.4924	0.7421	0.6194		0.34	5.1653	-	83.42		0.27024	0.086625	0.0805775	0.120294	0.154644
G3	S1-ISS+S2-ISS	0.4057	0.6794	0.5439	0.62	0.36	1.4063	92.711	53.9		0.086975	0.038736	0.0568079	0.100956	0.147077
G4	S2-TTS	0.3122	0.5082	0.4117		0.2	3.6868	-	70.95		0.258996	0.0751015	0.058912	0.0820294	0.105615
G5	AS1-S2TTS	0.2277	0.3594	0.2949	0.3	0.14	0.4404	56.13	65.31		0.0697122	0.0510859	0.0544289	0.0763209	0.0984559
G6	MS1-S2TTS	0.2843	0.4368	0.3628	0.36	0.17	2.0354	39.28	52.36		0.0824347	0.0497933	0.0538663	0.080005	0.104105
G7	PS1-S2TTS	0.2598	0.399	0.33	0.35	0.17	1.8314	51.76	48.68		0.0785598	0.0446968	0.0585973	0.0880871	0.110842

## Sheet: Forward flexion1
Group	Fixation		Vertical displacement of the superior surface of S1 (mm)		Deformation of the S1 segment screw (mm)	Deformation of the S1 segment screw (mm)	The superior surface of S1 in the sagittal plane angle displacement (degree)	S1 segment screw Maximum Von Mises stress(MPa)	S2 segment screw Maximum Von Mises stress(MPa)				Relative displacement(mm)
		Min	Max	Mean							1	2	3	4	5
Normal
G1	S1-ISS	0.5626	0.9347	0.7482	0.84		4.2863	135.16			0.1487	0.0845307	0.0696097	0.110278	0.155277
G2	S2-ISS	0.6321	1.0232	0.8285		0.46	7.741		100.15		0.411755	0.106179	0.100241	0.170445	0.288431
G3	S1-ISS+S2-ISS	0.5066	0.9069	0.7067	0.82	0.45	2.0727	120.1	65.97		0.106486	0.0485784	0.0704689	0.126723	0.167324
G4	S2-TTS	0.3948	0.7081	0.5497		0.23	4.6025		85.53		0.349703	0.113511	0.0722846	0.109955	0.142014
G5	AS1-S2TTS	0.2819	0.511	0.3961	0.41	0.16	1.7416	69.14	66.17		0.104995	0.0638875	0.0673769	0.0961861	0.120915
G6	MS1-S2TTS	0.3543	0.6123	0.4843	0.5	0.2	2.8408	63.32	65.77		0.121129	0.0679771	0.0743239	0.159333	0.148943
G7	PS1-S2TTS	0.3187	0.5614	0.4392	0.49	0.19	2.7304	75.77	60.1		0.115951	0.0565629	0.0670481	0.104749	0.141499

## Sheet: Left flexion
Group	Fixation		Vertical displacement of the superior surface of S1 (mm)		Deformation of the S1 segment screw (mm)	Deformation of the S1 segment screw (mm)	The superior surface of S1 in the sagittal plane angle displacement (degree)	S1 segment screw Maximum Von Mises stress(MPa)	S2 segment screw Maximum Von Mises stress(MPa)				Relative displacement(mm)
		Min	Max	Mean							1	2	3	4	5
Normal
G1	S1-ISS	0.4429	0.7184	0.623	0.7		3.7874	101.41			0.0791773	0.0525455	0.0368481	0.0801041	0.123731
G2	S2-ISS	0.4847	0.791	0.632		0.37	4.7602		73.8		0.223944	0.0687823	0.0678908	0.103447	0.130362
G3	S1-ISS+S2-ISS	0.4104	0.8041	0.6011	0.69	0.43	1.7578	90.36	61.03		0.0606599	0.0350261	0.0667589	0.109411	0.14197
G4	S2-TTS	0.2973	0.4714	0.3832		0.19	2.8308		58.83		0.162992	0.0547687	0.0446164	0.0720806	0.0945589
G5	AS1-S2TTS	0.2094	0.3774	0.2921	0.29	0.15	0.2788	48.56	66.7		0.0483297	0.0387145	0.0434776	0.0625438	0.0812604
G6	MS1-S2TTS	0.2601	0.4466	0.3525	0.35	0.18	0.3606	39.86	67.87		0.072826	0.0435659	0.0438664	0.0650724	0.0852032
G7	PS1-S2TTS	0.2392	0.4142	0.3259	0.35	0.18	0.5798	48.67	64.21		0.0555474	0.0352067	0.0431065	0.0674046	0.088538

## Sheet: Right flexion
Group	Fixation		Vertical displacement of the superior surface of S1 (mm)		Deformation of the S1 segment screw (mm)	Deformation of the S1 segment screw (mm)	The superior surface of S1 in the sagittal plane angle displacement (degree)	S1 segment screw Maximum Von Mises stress(MPa)	S2 segment screw Maximum Von Mises stress(MPa)				Relative displacement(mm)
		Min	Max	Mean							1	2	3	4	5
Normal
G1	S1-ISS	0.4238	0.6173	0.5158	0.56		1.3774	98.08			0.140229	0.124221	0.117202	0.157308	0.192224
G2	S2-ISS	0.472	0.7416	0.602		0.32	2.2331		102.76		0.323164	0.100726	0.0920311	0.131101	0.185503
G3	S1-ISS+S2-ISS	0.3776	0.5608	0.4684	0.53	0.29	0.7281	80.9	44.23		0.115233	0.0583583	0.0676719	0.104463	0.140911
G4	S2-TTS	0.2973	0.4714	0.3832		0.19	1.6891		58.83		0.15515	0.0536294	0.0456734	0.0721125	0.0987684
G5	AS1-S2TTS	0.2127	0.3797	0.2951	0.31	0.14	0.6141	64.96	63.58		0.0893269	0.0634413	0.0627123	0.0857687	0.112754
G6	MS1-S2TTS	0.2631	0.4491	0.3547	0.36	0.17	0.6821	55.32	54.15		0.121552	0.0660288	0.0691233	0.0947981	0.124207
G7	PS1-S2TTS	0.2464	0.4275	0.3352	0.36	0.17	0.6421	59.67	52.91		0.10017	0.0567542	0.0684639	0.104941	0.13657

## Sheet: Left rotation 
Group	Fixation		Vertical displacement of the superior surface of S1 (mm)		Deformation of the S1 segment screw (mm)	Deformation of the S2 segment screw (mm)	The superior surface of S1 in the sagittal plane angle displacement (degree)	S1 segment screw Maximum Von Mises stress(MPa)	S2 segment screw Maximum Von Mises stress(MPa)				Relative displacement(mm)
		Min	Max	Mean							1	2	3	4	5
Normal
G1	S1-ISS	0.4301	0.6407	0.5375	0.36		2.1783	57.16			0.108635	0.0875674	0.0692973	0.0893875	0.115933
G2	S2-ISS	0.4772	0.7107	0.5957		0.33	3.5631		92.18		0.297069	0.084898	0.0587865	0.0789713	0.101309
G3	S1-ISS+S2-ISS	0.3783	0.6022	0.4915	0.55	0.32	3.2098	87.52	45.42		0.0844796	0.0401622	0.0378711	0.0696532	0.0833469
G4	S2-TTS	0.3118	0.5263	0.4192		0.21	2.3366		80.45		0.254393	0.082079	0.053388	0.0640458	0.0798959
G5	AS1-S2TTS	0.2289	0.3589	0.2942	0.31	0.15	1.4012	57.68	64.12		0.076181	0.0538346	0.0469382	0.0617991	0.0748989
G6	MS1-S2TTS	0.2872	0.4387	0.3642	0.37	0.18	1.6287	49.14	48.87		0.0941586	0.0539681	0.0480375	0.0649973	0.0827897
G7	PS1-S2TTS	0.2616	0.4005	0.331	0.36	0.18	1.4675	57.16	45.45		0.0777843	0.0456245	0.046159	0.0666161	0.0857433

## Sheet: Right rotation 
Group	Fixation		Vertical displacement of the superior surface of S1 (mm)		Deformation of the S1 segment screw (mm)	Deformation of the S2 segment screw (mm)	The superior surface of S1 in the sagittal plane angle displacement (degree)	S1 segment screw Maximum Von Mises stress(MPa)	S2 segment screw Maximum Von Mises stress(MPa)				Relative displacement(mm)
		Min	Max	Mean							1	2	3	4	5
Normal
G1	S1-ISS	0.6355	1.1279	0.8795	1.07		18.593	206.12			0.12707	0.121776	0.169578	0.258021	0.318505
G2	S2-ISS	0.7337	1.2876	1.0185		0.65	22.727		150.88		0.183898	0.0893773	0.138008	0.223211	0.283899
G3	S1-ISS+S2-ISS	0.5879	1.1308	0.8556	1.08	0.61	15.733	191.34	123.81		0.0860555	0.0827064	0.231495	0.315658	0.380132
G4	S2-TTS	0.3672	0.633	0.5039		0.22	9.8009		90.77		0.129802	0.0745771	0.103244	0.170392	0.18873
G5	AS1-S2TTS	0.2424	0.407	0.3269	0.33	0.14	3.1175	72.31	64.8		0.0719635	0.0632918	0.0875263	0.124373	0.152137
G6	MS1-S2TTS	0.3222	0.5205	0.4252	0.42	0.18	4.8906	63.08	72.76		0.0999579	0.0674116	0.0919129	0.134616	0.167222
G7	PS1-S2TTS	0.287	0.4665	0.3786	0.42	0.17	4.3542	69.47	63.25		0.0880012	0.0615251	0.0899094	0.138386	0.17425
